# Supplementary material for: Insulin-like Peptides of the Western Flower Thrips Frankliniella occidentalis and Their Mediation of Immature Development
Source: MDPI journal article supplement (doi:10.3390/insects14010047), 2023-01-03
Supplement: s1 [file s1]

## Supplementary Information

**Table S1.** Hot pepper varieties used in the present study, where ‘R’ and ‘S’ indicate resistant and susceptible varieties to the tomato spotted wilt virus (TSWV), respectively.

| <b>Response to TSWV</b> | <b>Trade names of varieties</b> | <b>Suppliers</b> |
|-------------------------|---------------------------------|------------------|
| R1                      | Asian Jumbo F1                  | Asia Korea Seed  |
| R2                      | Color Kang                      | Asia Korea Seed  |
| R3                      | Bul Color                       | Hungnong         |
| S1                      | Nok Kang                        | Farm Hannong     |
| S2                      | Han Lim Ggwari Put F1           | Asia Korea Seed  |

**Table S2.** GenBank accession numbers of the genes assessed in the present study

| <b>Genes</b> | <b>Accession numbers</b> | <b>Genes</b> | <b>Accession numbers</b> |
|--------------|--------------------------|--------------|--------------------------|
| Dm-ILP1      | NP_648359.1              | BmA10        | NP_001121787.1           |
| Dm-ILP2      | NP_524012.1              | BmB1         | NP_001121791.1           |
| Dm-ILP3      | NP_648360.2              | BmB2         | NP_001121793.1           |
| Dm-ILP4      | NP_648361.1              | BmB3         | BAA00674.1               |
| Dm-ILP5      | NP_996037.2              | BmB4         | NP_001121792.2           |
| Dm-ILP6      | NM_001272256.1           | BmB5         | NP_001166891.1           |
| Dm-ILP7      | NP_570070.1              | BmB6         | NP_001121795.1           |
| Dm-ILP8      | NM_140692.3              | BmB7         | NP_001121789.1           |
| Fo-ILP1      | XP_026281410.            | BmB8         | NP_001121790.1           |
| Fo-ILP2      | XP_026276022.1           | BmB9         | BAA00682.1               |
| BmA1         | Q17192.1                 | BmB10        | NP_001121788.1           |
| BmA2         | NP_001103771.1           | BmB11        | NP_001121606.1           |
| BmA3         | NP_001166890.1           | BmB12        | NP_001121794.2           |
| BmA4         | NP_001121607.2           | BmC1         | NP_001119736.1           |
| BmA5         | NP_001121608.2           | BmC2         | NP_001119735.1           |
| BmA6         | BAA00667.1               | BmD1         | NP_001121635.1           |
| BmA7         | NP_001121629.2           | BmE1         | NP_001119733.1           |
| BmA8         | NP_001121630.1           | BmF1         | NP_001119734.1           |
| BmA9         | BAA00672.1               | BmG1         | NP_001121634.1           |

**Table S3.** Primer sequences used in the present study.

| <b>Genes</b> | <b>Sequences</b>                                 | <b>Annealing<br/>(°C)</b> | <b>Product<br/>(bp)</b> |
|--------------|--------------------------------------------------|---------------------------|-------------------------|
| Fo-ILP1      | CGACAAGAAGTACATCCACAA                            | 50                        | 271                     |
|              | TTAGCTGTAGGGGCGTCT                               |                           |                         |
| Fo-ILP2      | AAGAGTACTGGACGCCG                                | 50                        | 155                     |
|              | CACATCGCAATAGTTCATCAG                            |                           |                         |
| T7-FO ILP1   | TAATACGACTCACTATAGGGAGACGACAAGAAGTACATC<br>CACAA | 50                        | 316                     |
|              | TAATACGACTCACTATAGGGAGATTAGCTGTAGGGGCGT<br>CT    |                           |                         |
| T7-FO ILP2   | TAATACGACTCACTATAGGGAGAGAGGAAGAGTACTGG<br>ACGC   | 50                        | 201                     |
|              | TAATACGACTCACTATAGGGAGAGTTCATCAGCTCGTCTA<br>TGG  |                           |                         |
| EF1          | TCAAGGAACTGCGTCGTGGAT                            | 50 -55                    | 129                     |
|              | ACAGGGGTGTAGCCGTTAGA                             |                           |                         |

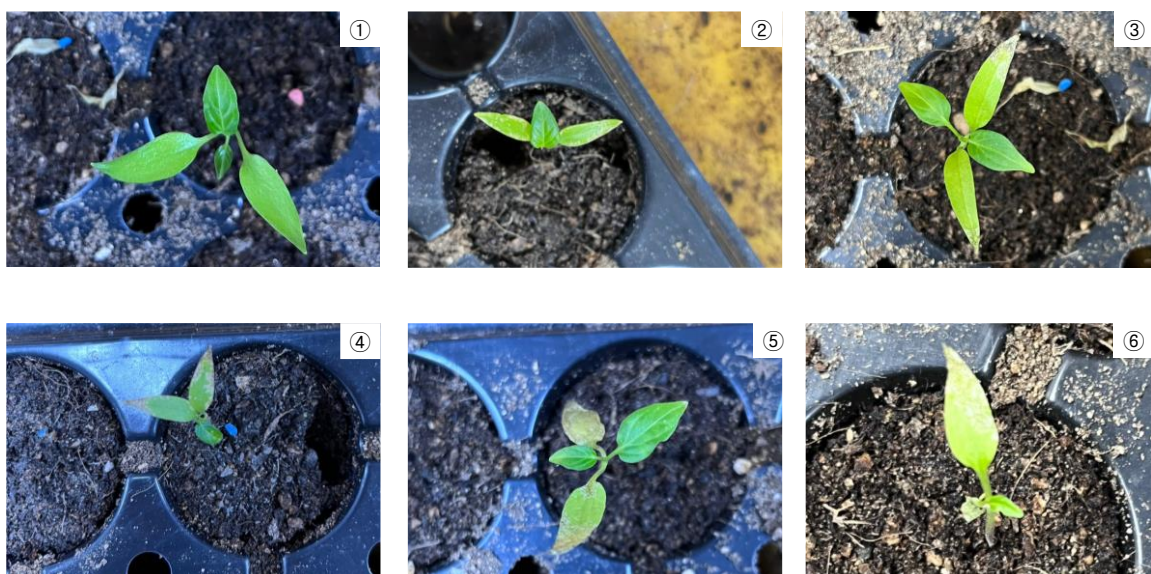

**Figure S1.** Evaluation of the damage intensity on a scale of 0 (no damage) to 5 (severe damage) due to thrips feeding. Damage was classified into 6 grades: no damage ① for grade 0, small damage limited to one leaf ② for grade 1, two leaves damage on the upper 1/3 ③ for grade 2, two leaves damage on the upper 1/2 ④ for grade 3, more than 2 leaves damage ⑤ for grade 4, and all leaves damaged with yellowish color ⑥ for grade 5.
